# Supplementary material
Source: publisher figshare collection journal article supplement (https://frontiersin.figshare.com/ndownloader/files/24089270)
Supplement: Supplementary file [file 24089270]

**Supplementary Figure**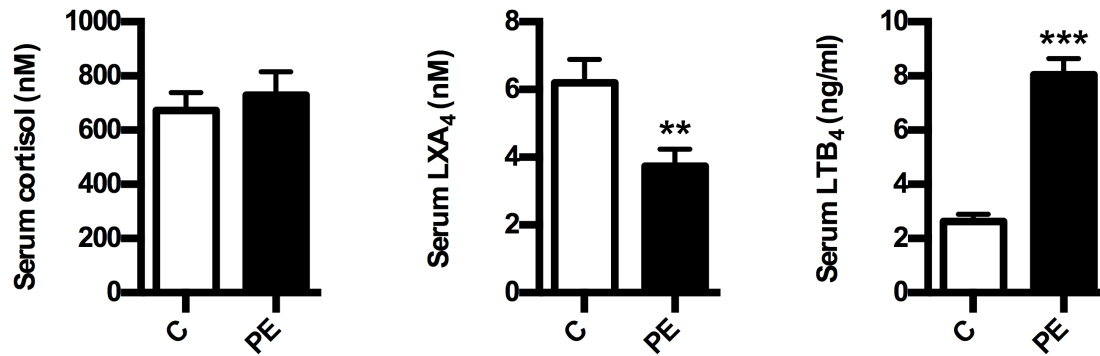

**Supplementary Figure 1.** Serum levels of cortisol and LXA<sub>4</sub> in human PE. (A) Comparison of serum cortisol levels between PE patients and healthy controls; (B) Comparison of serum LXA<sub>4</sub> levels between PE patients and healthy controls; (C) Comparison of serum LTB<sub>4</sub> levels between PE patients and healthy controls. Results are expressed as means  $\pm$  SEM (n=13 in each group).

\*\*p<0.01 and \*\*\*p<0.001 versus control group, two-tailed Student's t-test.
